# Supplementary material for: How does Social Network Influence Job Search on Career-oriented Social Platforms? A Study Based on the Multi-agent Simulation Method
Source: Research Square preprint supplement (doi:10.21203/rs.3.rs-6278674/v1), 2025-04-15
Supplement: Supplementary file 1 [file 36fa65d1ec347d368528d436.docx]

**Supplementary Materials for Sampling Process**

The specific steps of the sampling algorithm are as follows:

Figure 5 Schematic Diagram of the Integrated Sampling Model

Step 1: Compute the set of sampling points. As illustrated in Figure 5, based on the current node (e.g., node ). Calculate the set of neighboring nodes set (i.e., the neighboring nodes of node include ) and the global nodes set (i.e., all other nodes except in the figure), and then proceed to Step 2.

Step 2: Determine the sampling node set. The subsequent node will be sampled with a probability of from the set , or with a probability of () from the set . Should the random probability and the set not empty, determine that the next node shall be sampled from the set and proceed to Step 3. In case where or the set is devoid of elements, the succeeding node shall be sampled from set and then proceed to Step 4.

Step 3: Sampling from the neighborhood. To sample from the set of neighboring nodes , each node within the set is assigned with a distinct weight. As illustrated in Figure 5, the node is the predecessor node of node . Following the node2vec sampling algorithm, the weight attributed to their common neighbor is 1 (e.g., ), whereas nodes that are neighbors of but not of bear the weight (e.g., ). The weight of the predecessor node is . Notably, if there is no predecessor node for node (e.g., the starting point), uniform weights are assigned to all node within set . Ultimately, the weight values of each node are converted into probabilities, and a node is randomly selected as the next node in the network based on the respective probabilities. This completes one iteration, prompting a return to Step 1.

Step 4: Global sampling. Uniform weights are assigned to all nodes within set . Subsequently, the weight values of each node are converted into probabilities, and a node is randomly selected as the next node in the network based on the respective probabilities. This concludes one iteration, leading back to Step 1.
